# Supplementary material for: A NO/ROS/RNS cascaded-releasing nano-platform for gas/PDT/PTT/immunotherapy of tumors
Source: Royal Society of Chemistry journal article supplement (doi:10.1039/d1bm00726b), 2021-01-01
Supplement: d1bm00726b1.pdf [file d1bm00726b1.pdf]

## Supplementary material

### NO/ROS/RNS Cascaded-Releasing Nano-Platform for Gas/PDT/PTT/Immunotherapy of Tumor

Mengchao Ding<sup>a</sup>, Kai Shao<sup>b</sup>, Lijuan Wu<sup>c</sup>, Yuping Jiang<sup>a</sup>, Bing Cheng<sup>a</sup>, Lili Wang<sup>d</sup>, Jinsheng Shi<sup>a\*</sup>, Xiaoying Kong<sup>a\*</sup>

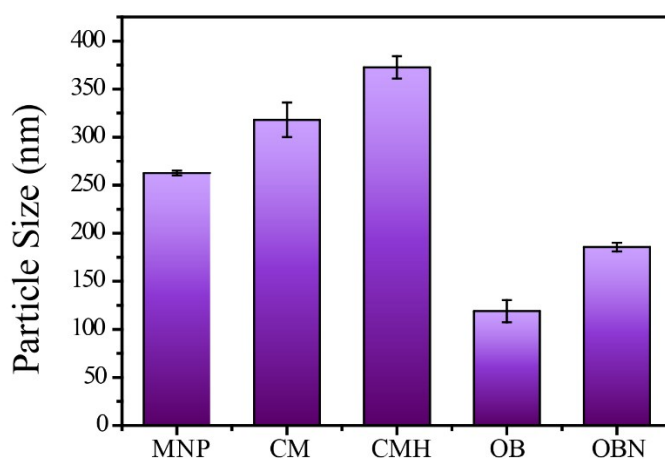

**Figure S1.** The particle size of MNP, CM, CMH, OB and OBN NPs.

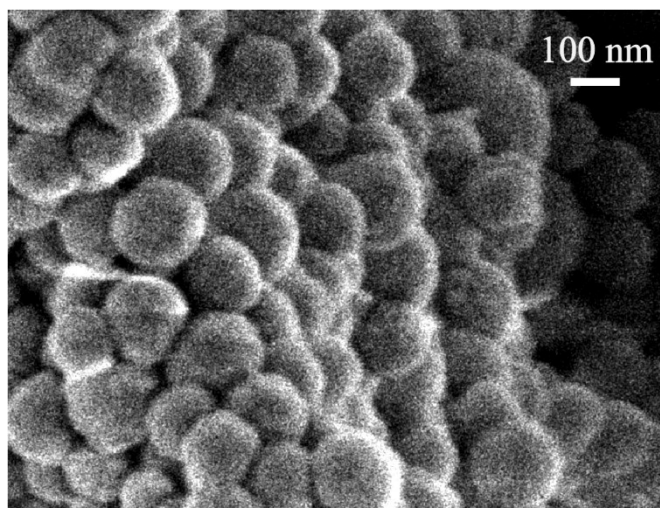

**Figure S2.** The SEM of CMH NPs.

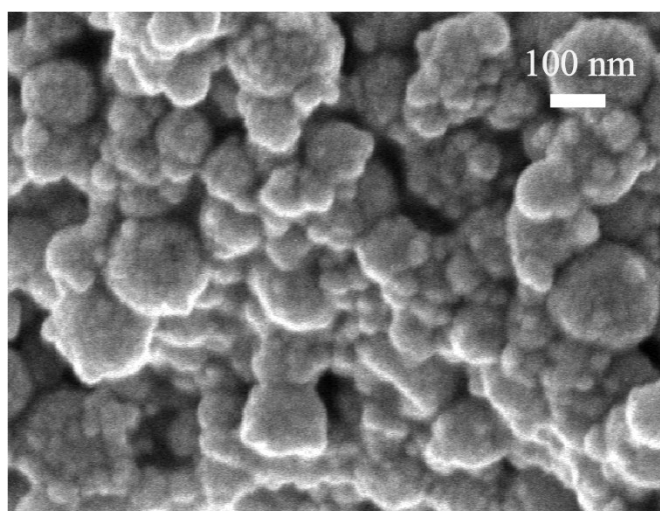

**Figure S3.** The SEM of OBN microcapsules.

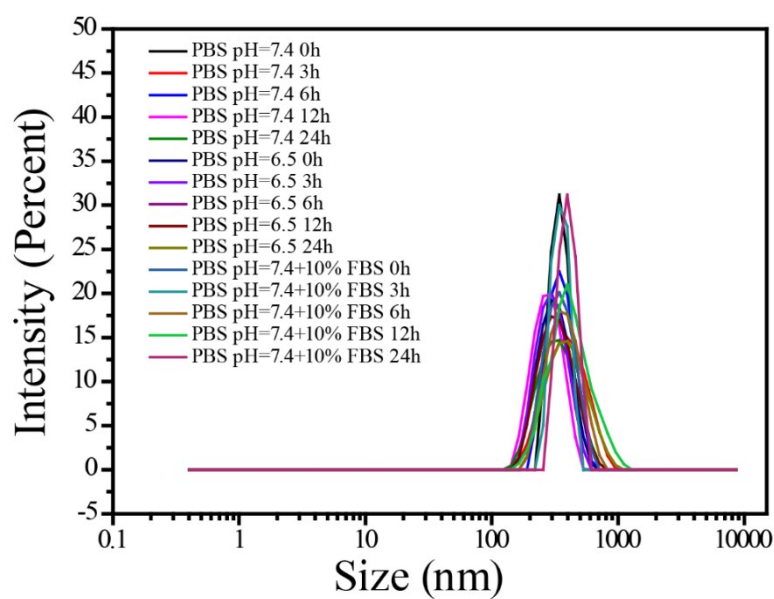

**Figure S4.** Stability of particle size of CMH in different simulation environments.

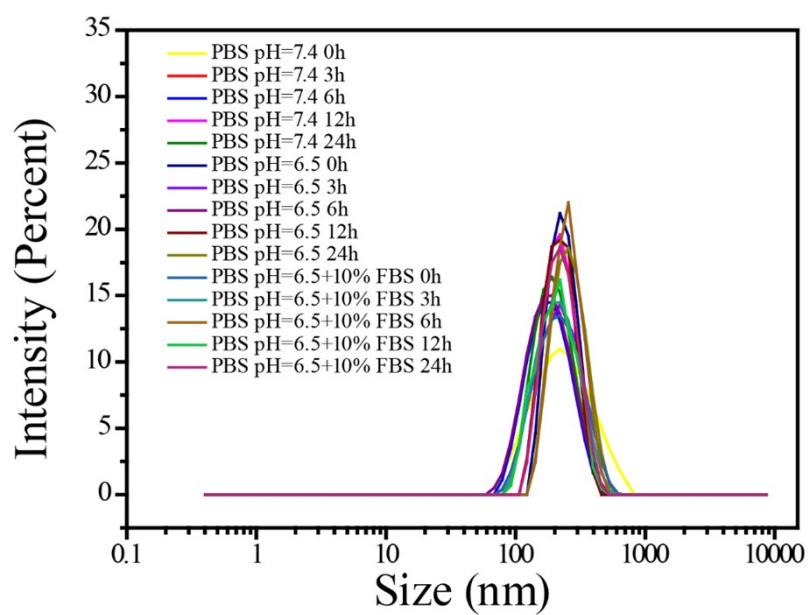

**Figure S5.** Stability of particle size of OBN in different simulation environments.

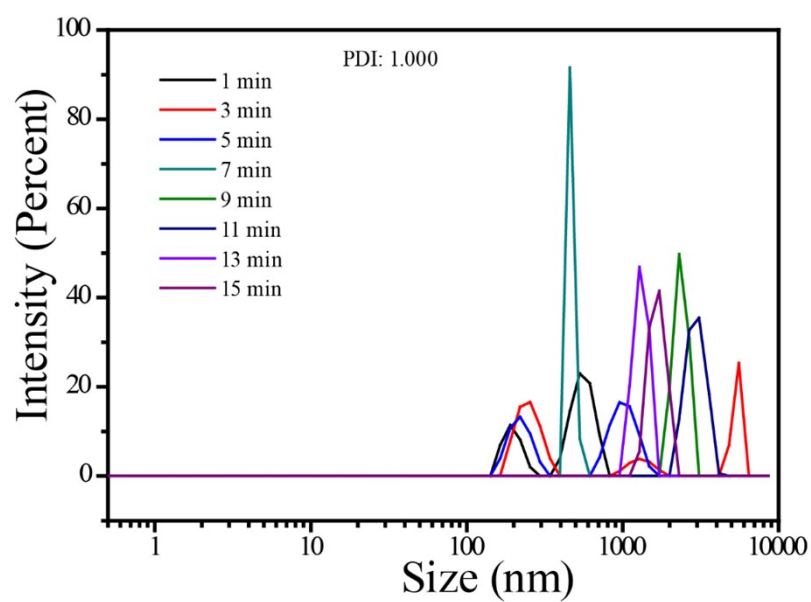

**Figure S6.** The change of size distribution of OBN microcapsules with ROS.

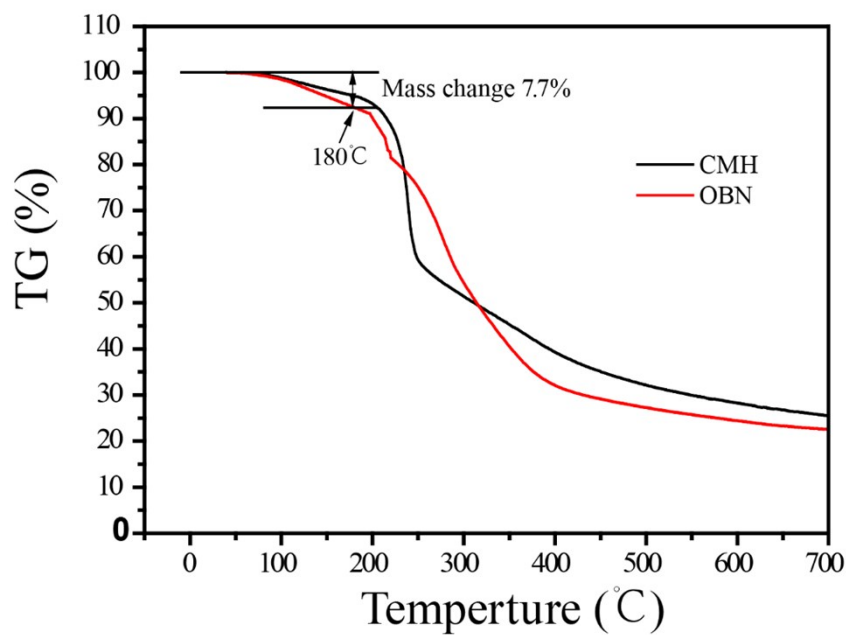

**Figure S7.** The TG curves of CMH NPs and OBN microcapsules.

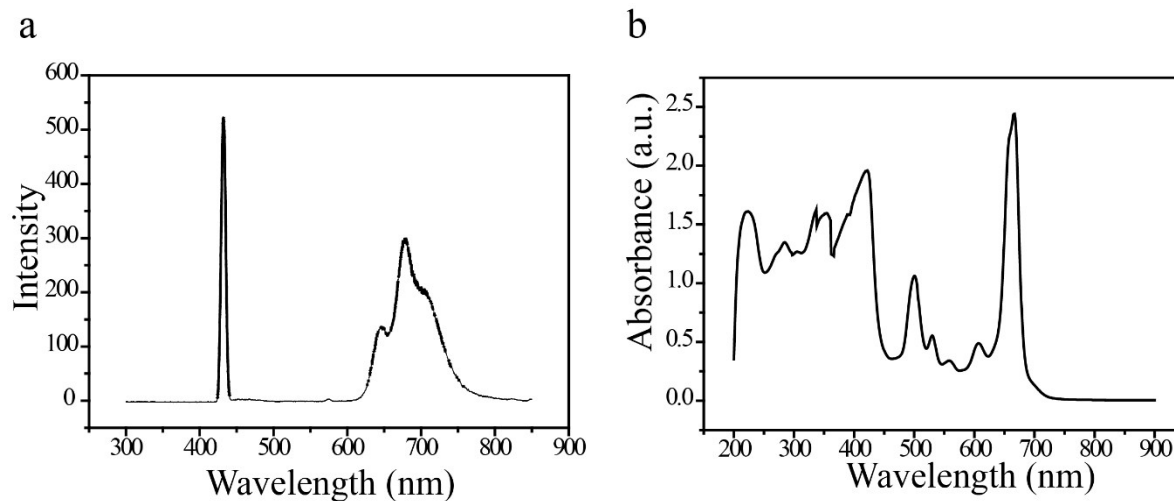

**Figure S8.** UV-vis-NIR absorption spectra (a) and Fluorescence excitation spectra (b) of Ce6.

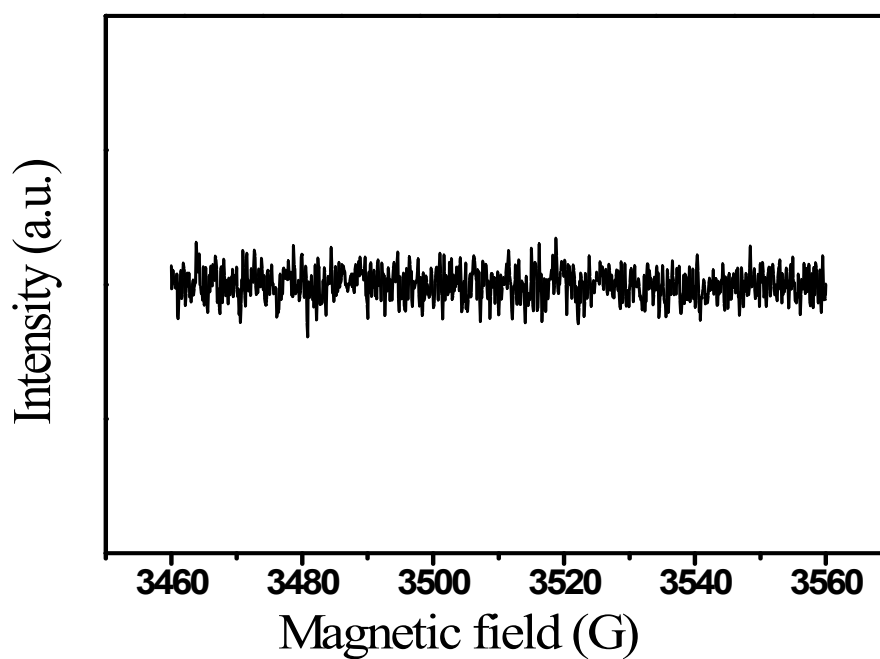

**Figure S9.** •OH EPR spectra of CMH NPs with 808 nm laser (1 W cm<sup>-2</sup>, 5 min) and blank control group.

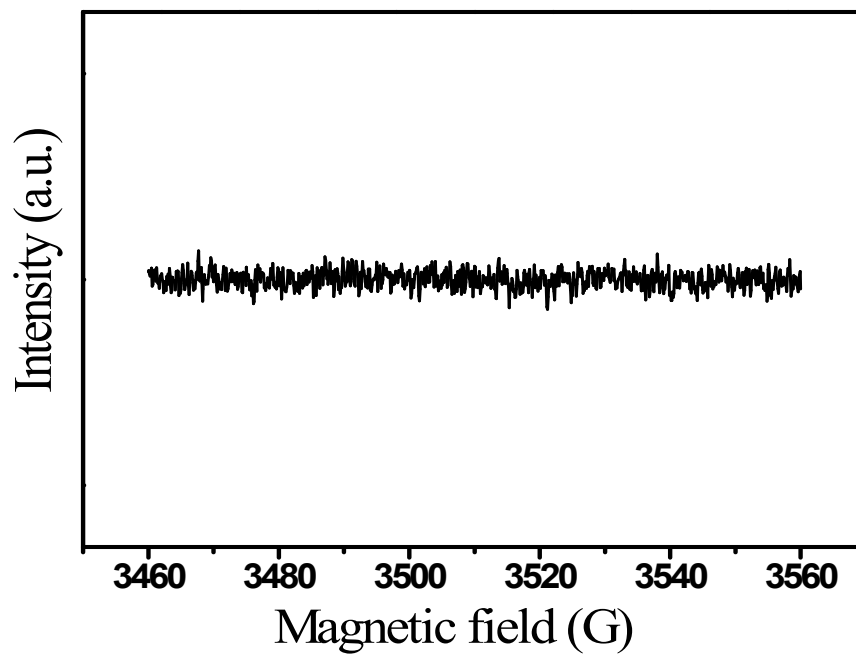

**Figure S10.**  $O_2^{\cdot -}$  EPR spectra of CMH NPs with 808 nm laser ( $1 \text{ W cm}^{-2}$ , 5 min) and blank.

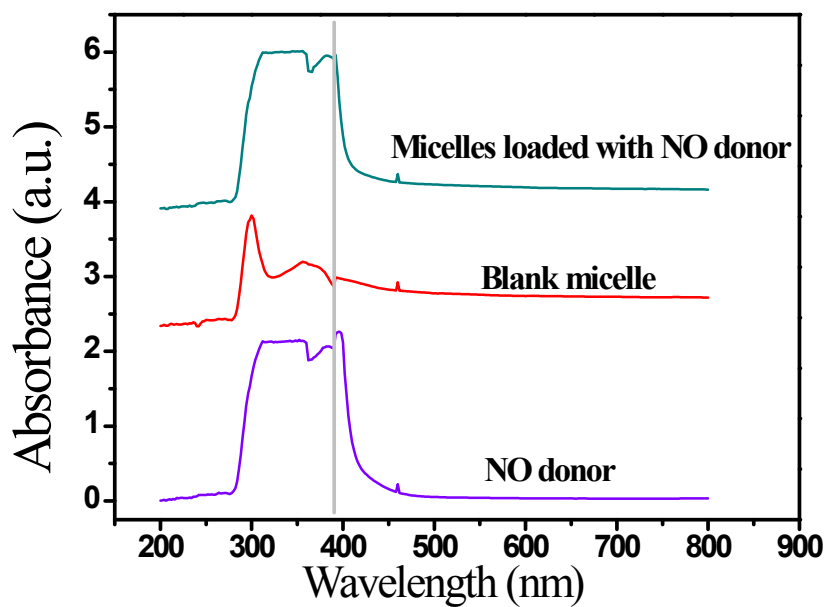

**Figure S11.** UV-vis-NIR absorption spectra of benzofuroxan (NO donor), OB micelle and OBN micelles.

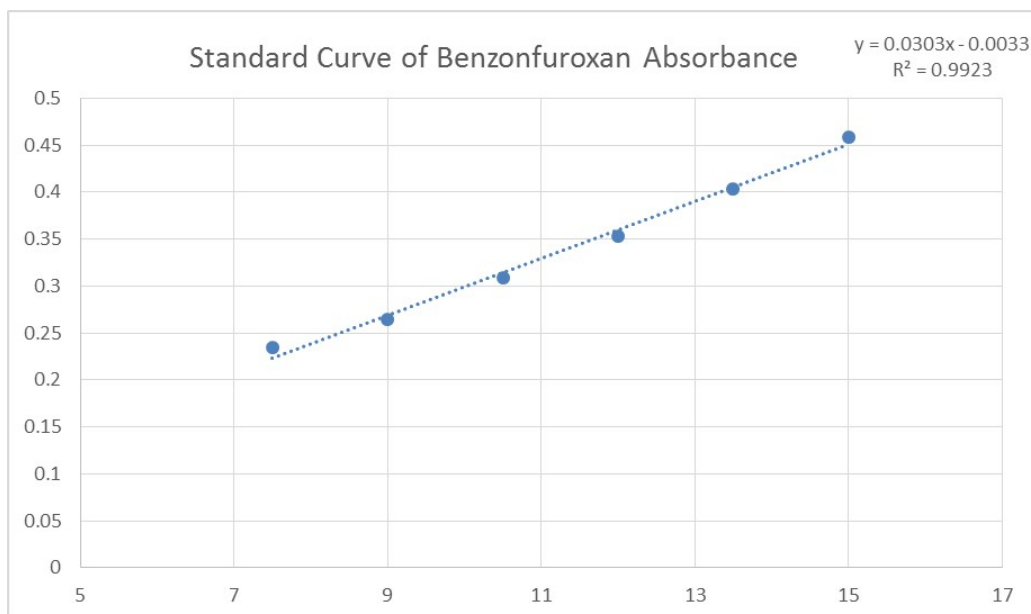

**Figure S12.** Standard curve of absorbance of benzonfuroxan.

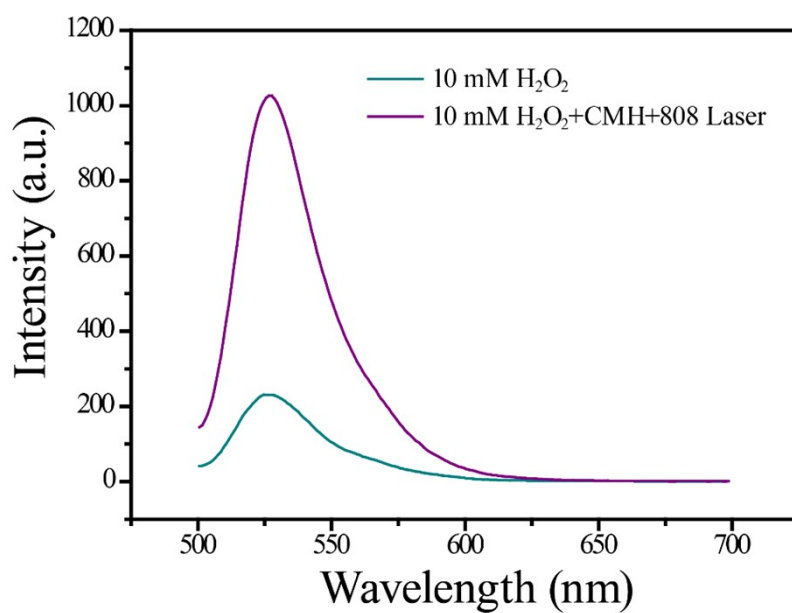

**Figure S13.** Fluorescence intensity of ROS of 10 mM H<sub>2</sub>O<sub>2</sub> and 10 mM H<sub>2</sub>O<sub>2</sub>+CMH NPs (1 mg mL<sup>-1</sup>) under 808 nm laser irradiation (1 W cm<sup>-2</sup>, 5 min).

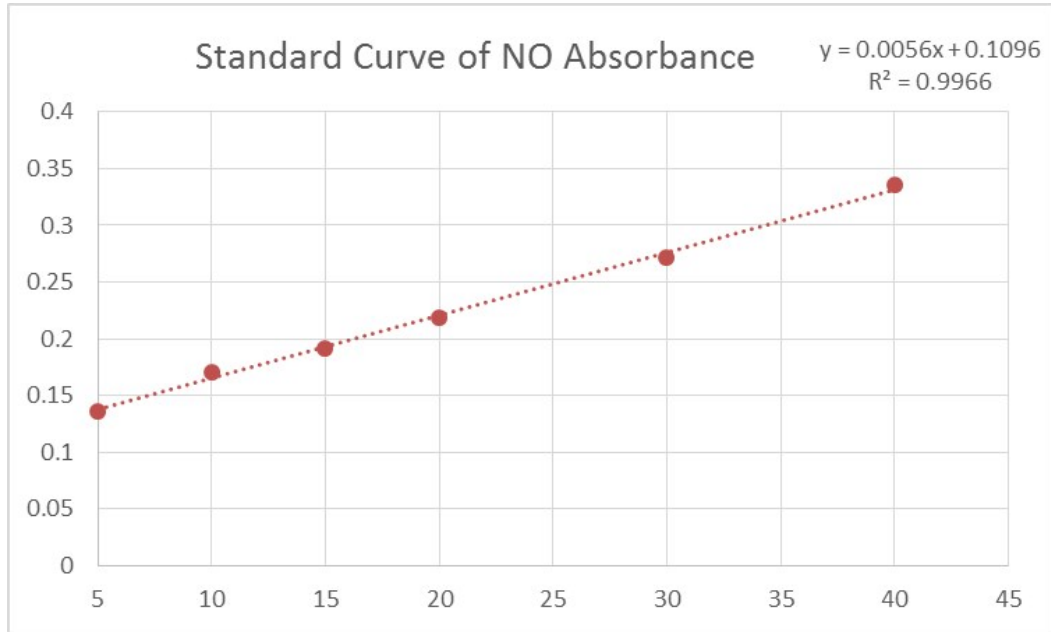

**Figure S14.** Standard curve of absorbance of NO.

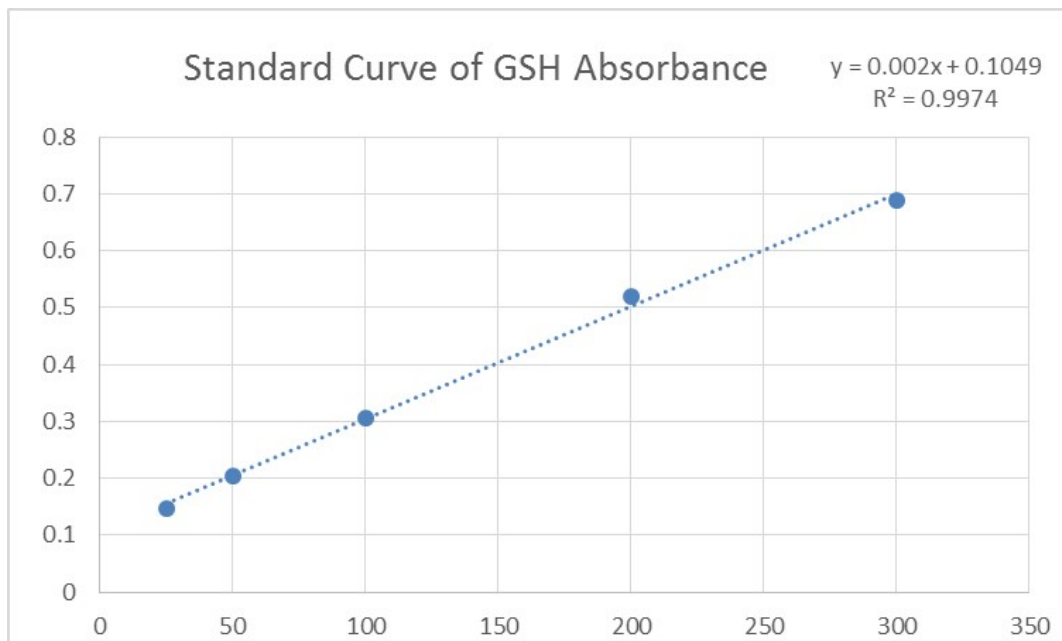

**Figure S15.** Standard curve of absorbance of GSH.



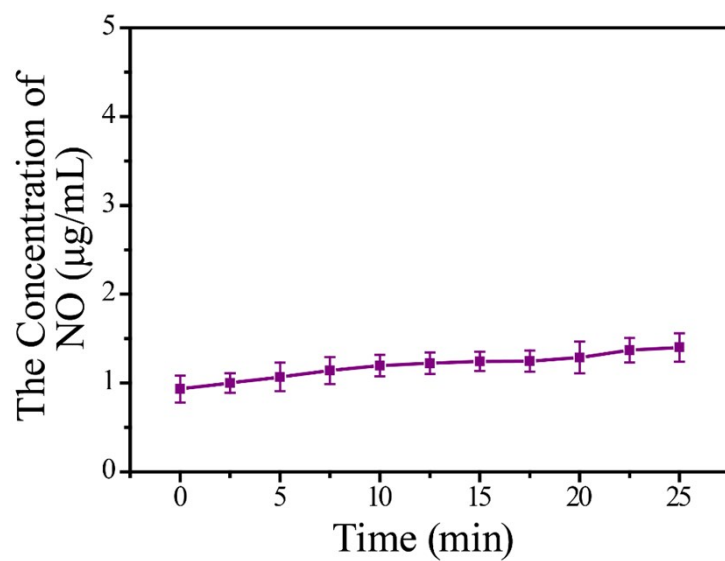

**Figure S16.** The amount of NO released in 2 mM GSH.

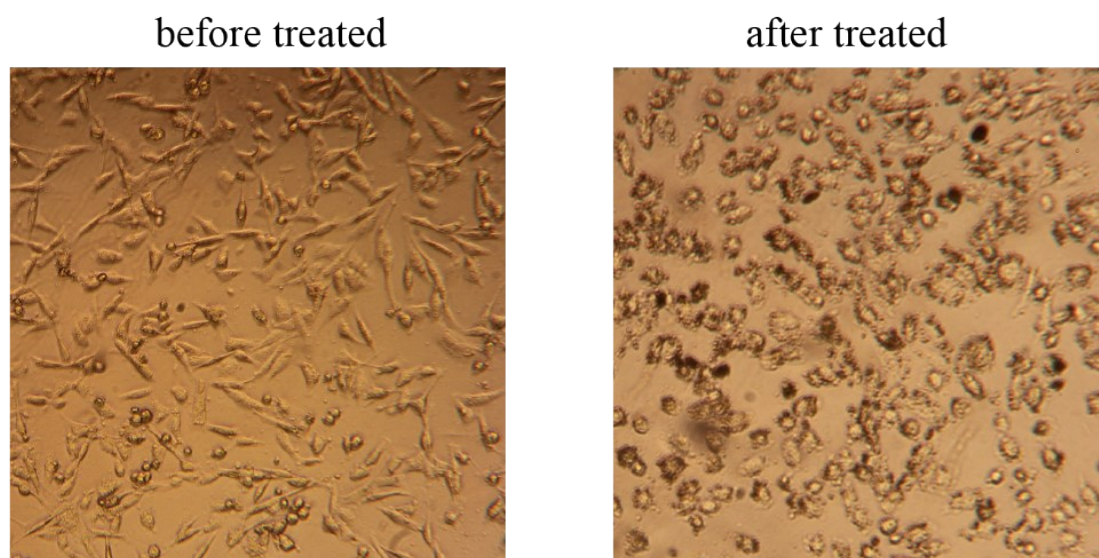

**Figure S17.** The cell morphology of 4T1 before and after treatment with CMH-OBN nano-platform under 808 nm irradiation ( $1 \text{ W cm}^{-2}$ , 5 min).

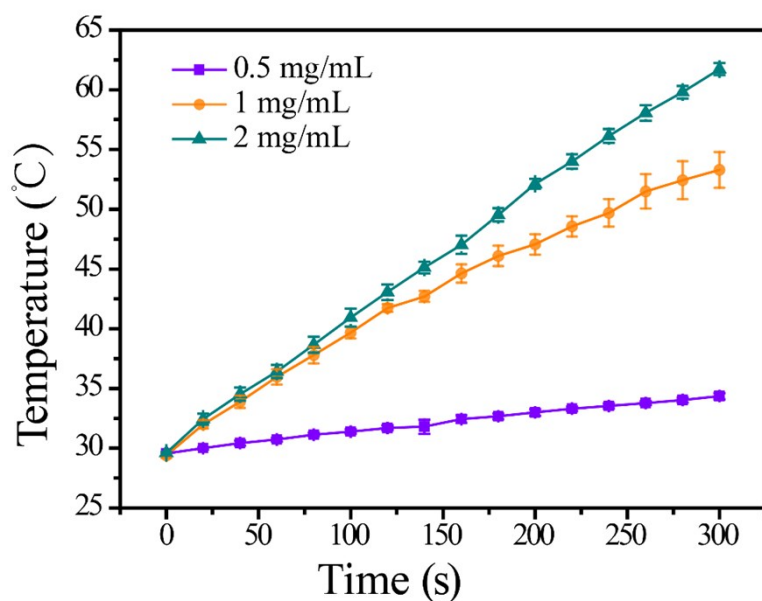

**Figure S18.** Temperature rise curves of CMH NPs with different concentrations upon irradiation (808 nm, 1 W cm<sup>-2</sup>, 5 min).

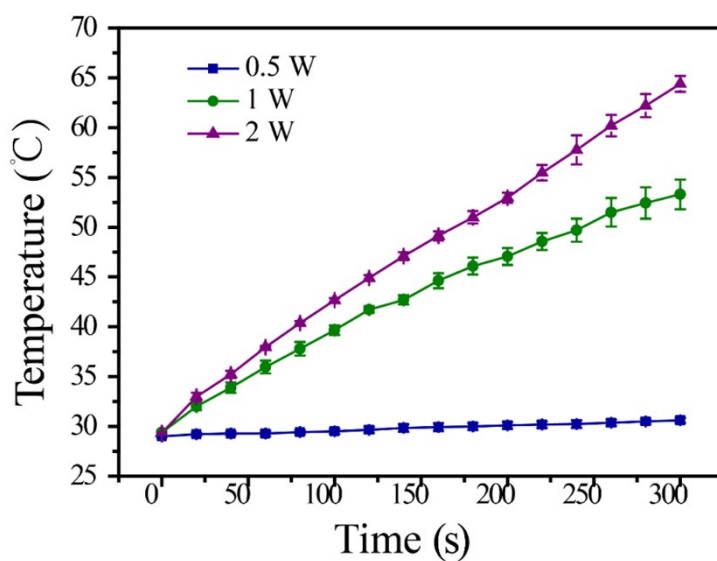

**Figure S19.** Temperature rise curves of CMH NPs with different wattage laser irradiation (808 nm, 1 mg mL<sup>-1</sup>, 5 min).

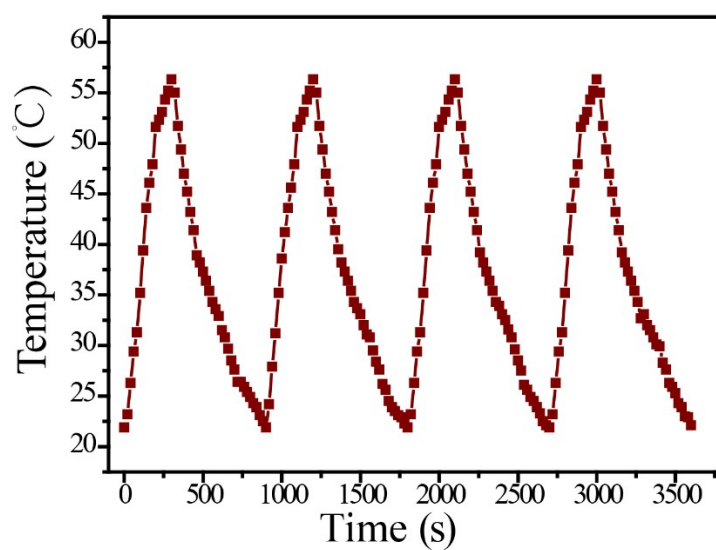

**Figure S20.** The photothermal conversion cycling of CMH aqueous solution (808 nm, 1 W cm<sup>-2</sup>).

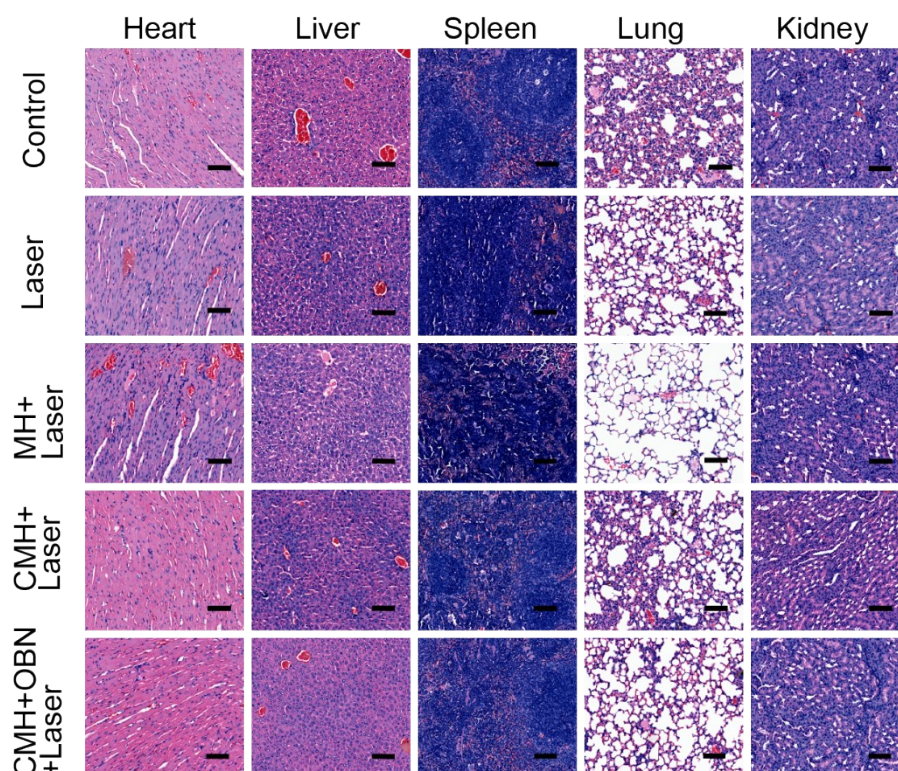

**Figure S21.** H&E staining of major organs of different groups on the 9<sup>th</sup> day (scale bar: 25 μm).

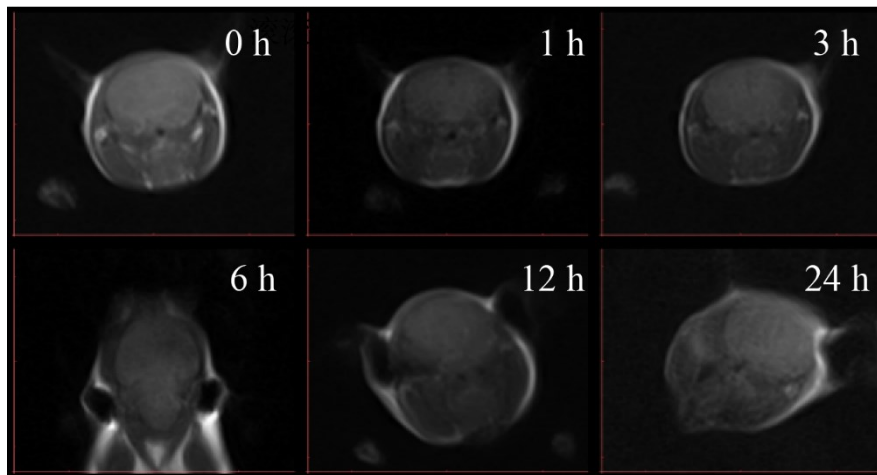

**Figure S22.** T1-weighted MR images of coronal plane of the brain of Kunming mice irradiated for 5 min at different time points after intravenous injection of CMH NPs.

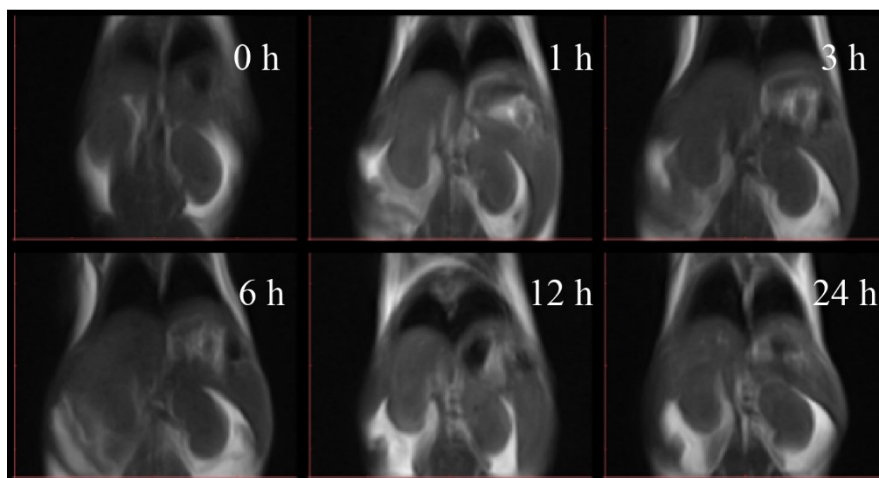

**Figure S23.** T1-weighted MR images of coronal plane of abdomen of Kunming mice irradiated for 5 min at different time points after intravenous injection of CMH NPs.



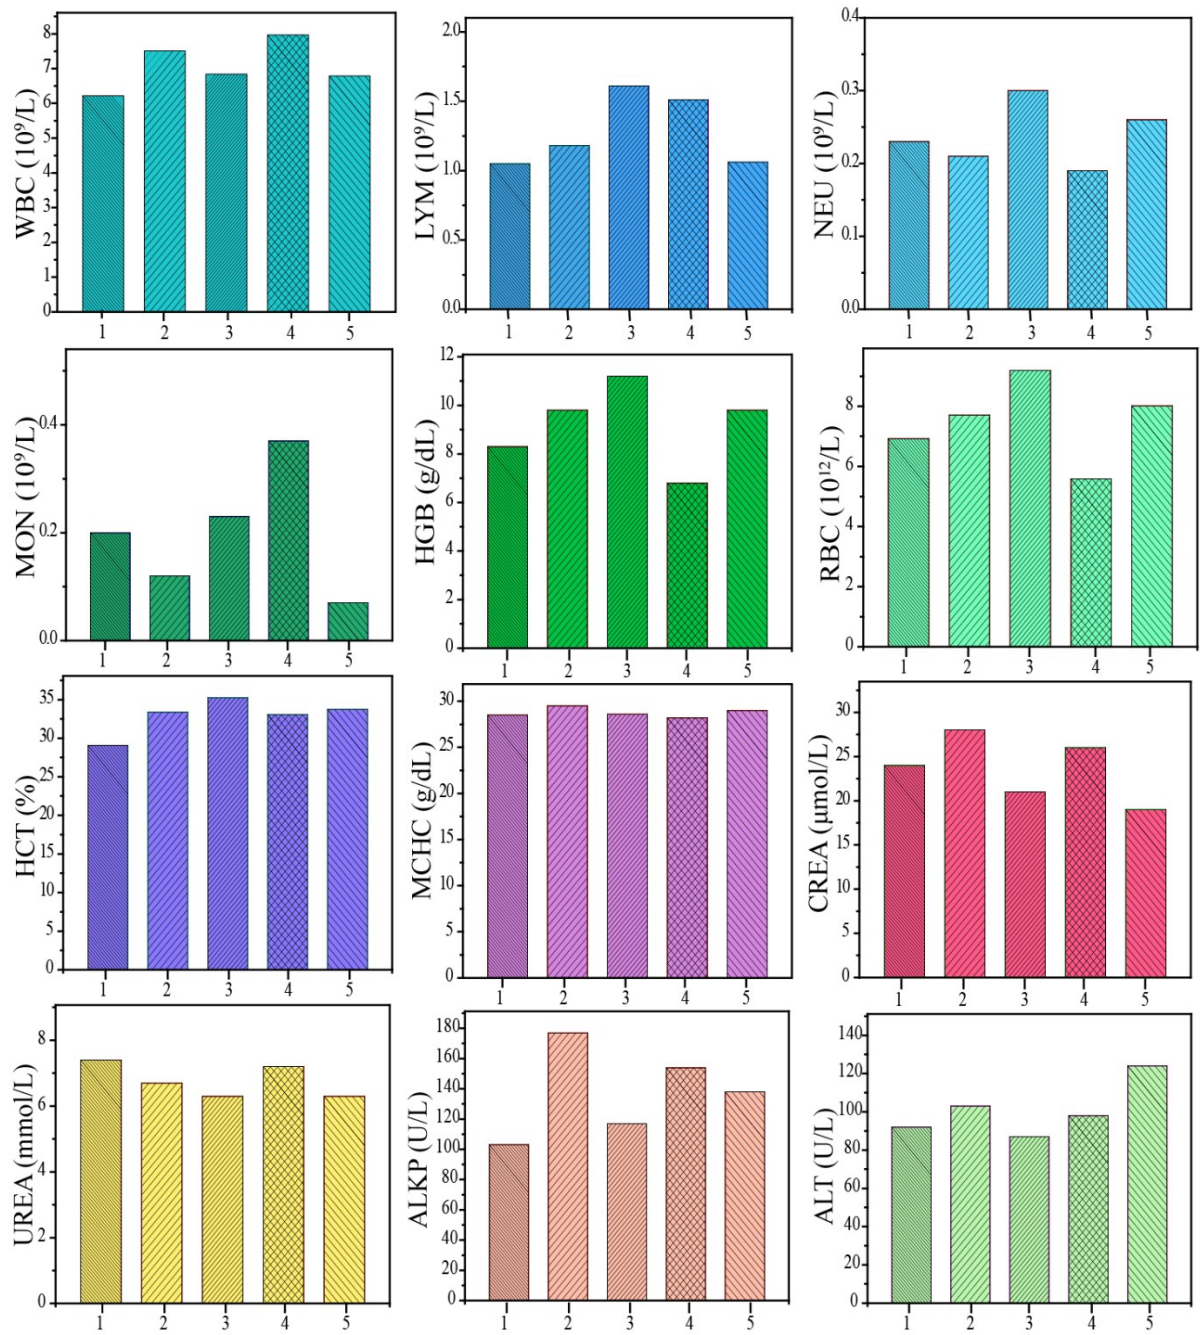

**Figure S24.** The serum biochemistry and complete blood panel analysis of Kunming mice.

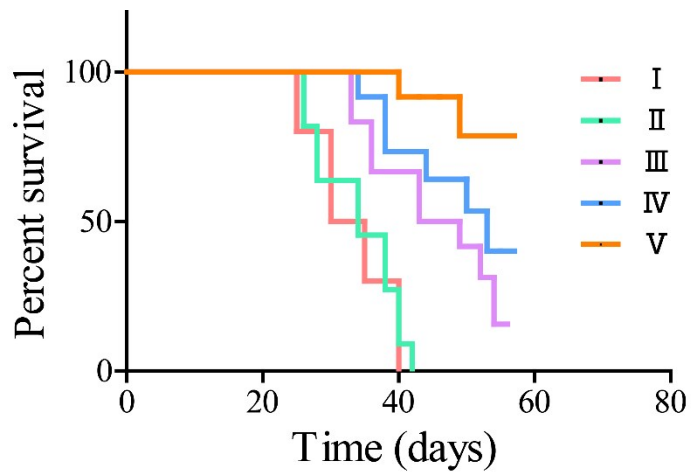

**Figure S25.** Survival curves of Kunming mice in different groups. Five groups: ( I ) saline; ( II ) saline + Laser; ( III ) MH + Laser; ( IV ) CMH + Laser; ( V ) CMH + OBN + Laser
